# Supplementary material for: Lifestyle, WCRF/AICR Recommendations, and Esophageal Adenocarcinoma Risk: A Systematic Review of the Literature
Source: MDPI journal article supplement (doi:10.3390/nu13103525), 2021-10-08
Supplement: s1 [file s1]

**Supplementary Table S1.** Characteristics of included case-control studies, in alphabetical order.

[illegible]



|                           |           |                               |     |       |                                                                                                              |                                                                                         |                                                                                                                                                                           |
|---------------------------|-----------|-------------------------------|-----|-------|--------------------------------------------------------------------------------------------------------------|-----------------------------------------------------------------------------------------|---------------------------------------------------------------------------------------------------------------------------------------------------------------------------|
|                           |           |                               |     |       |                                                                                                              | intake was assessed using a 101-item FFQ, adapted from a version of the EPIC-FFQ.       |                                                                                                                                                                           |
| de Jonge et al. 2006 [42] | 2003-2005 | Hospital-based case-control   | 91  | 244   | To identify risk factors to differentiate between Barrett's Esophagus patients with low or high risk of EAC. | Non-validated questionnaire.                                                            | Tobacco smoking and BMI >25 Kg/m2 increased the risk of EAC.                                                                                                              |
|                           | NL        |                               |     |       |                                                                                                              |                                                                                         |                                                                                                                                                                           |
| Drahos et al. 2016 [43]   | 1992-2012 | Population-based case-control | 592 | 2,901 | To investigate MetS in relation to EAC.                                                                      | GPRD                                                                                    | No association between MetS and risk of EAC.                                                                                                                              |
|                           | UK        |                               |     |       |                                                                                                              |                                                                                         |                                                                                                                                                                           |
| Duan et al. 2009 [44]     | 1992-1997 | Population-based case-control | 220 | 1,356 | Relation between passive smoking and risk of EAC.                                                            | In-person interview with structured questionnaire.                                      | Current smokers were at increased EAC risk. Exposure to at least one smoker during adulthood was associated with an elevated risk of EAC.                                 |
|                           | US        |                               |     |       |                                                                                                              |                                                                                         |                                                                                                                                                                           |
| Engel et al. 2003 [45]    | 1993-1995 | Population-based case-control | 293 | 695   | To identify population attributable risk (PAR) for EAC.                                                      | Trained interviewers administered structured, in-person interviews; FFQ; Blood samples. | Increasing levels of education or income decreased the risk of EAC. Smoking increased the risk. Beer and hard liquor were not associated. Wine decreased the risk of EAC. |
|                           | US        |                               |     |       |                                                                                                              |                                                                                         |                                                                                                                                                                           |
| Gammon et al. 1997 [46]   | 1993-1995 | Multicenter case-control      | 293 | 695   | To identify EAC risk factors.                                                                                | Face-to-face interviews with structured questionnaire.                                  | Doubled risk of EAC among current and former smokers. No association between beer and hard liquor intake. 40% risk reduction was associated with wine drinking.           |
|                           | US        |                               |     |       |                                                                                                              |                                                                                         |                                                                                                                                                                           |
| Gao et al. 1994 [47]      | 1990-1993 | Case-control                  | 51  | 1,552 | Relation between alcohol consumption, smoking habit and risk of EAC.                                         | Structured standardized questionnaire.                                                  | Smoking more than 30 cig/day was associated with an increased risk of EAC. Alcohol did not increase EAC risk.                                                             |
|                           | CN        |                               |     |       |                                                                                                              |                                                                                         |                                                                                                                                                                           |
|                           | 1989-1991 | Case-control                  | 56  | 200   |                                                                                                              |                                                                                         |                                                                                                                                                                           |

|                            |                             |                               |     |       |                                                                                            |                                                                                                              |                                                                                                                                                                                   |
|----------------------------|-----------------------------|-------------------------------|-----|-------|--------------------------------------------------------------------------------------------|--------------------------------------------------------------------------------------------------------------|-----------------------------------------------------------------------------------------------------------------------------------------------------------------------------------|
| Garidou et al. 1996 [48]   | GR                          |                               |     |       | Relation between lifestyle and EAC risk.                                                   | Structured standardized questionnaire; FFQ.                                                                  | Higher education was associated with a decreased risk of EAC. Smoking and alcohol were risk factors for EAC. Hot or very hot beverages were associated with a higher risk of EAC. |
| Hashibe et al. 2007 [49]   | 2000-2002<br>RO, RU, CZ, PL | Multicenter case-control      | 35  | 1,114 | Relation between cigarette smoking, alcohol intake and EAC risk.                           | Face-to-face interview with structured questionnaire.                                                        | No statistical association between cigarette smoking, alcohol consumption and EAC.                                                                                                |
| Ibiebele et al. 2012 [50]  | 2002-2005<br>AU             | Population-based case-control | 299 | 1,507 | To investigate the role of dietary patterns in EAC risk.                                   | Self-administered questionnaire (general data); 139-item semi-quantitative FFQ.                              | Meat-and-fat dietary pattern had a 2-fold increased risk of EAC. High-fat dairy foods play a dominant role in the association between the meat-and-fat pattern and risk of EAC.   |
| Ibiebele et al. 2013 [51]  | 2002-2005<br>AU             | Population-based case-control | 299 | 1,507 | Relation between dietary antioxidant intake and risk of EAC.                               | 135-item semi-quantitative FFQ.                                                                              | Inverse association between vitamin E intake, high antioxidant and EAC.                                                                                                           |
| Jansson et al. 2005 [52]   | 1995-1997<br>SE             | Population-based case-control | 189 | 820   | To examine the association between socioeconomic status and development of EAC.            | Questionnaire to collect data on occupational history, educational level and other socioeconomic dimensions. | Low socioeconomic status increased EAC risk. However, the association is not statistically significant in the adjusted model.                                                     |
| Lagergren et al. 1999 [53] | 1995-1997<br>SE             | Population-based case-control | 189 | 820   | To examine the association between BMI and EAC.                                            | Face-to-face interview.                                                                                      | The association between BMI and EAC is highly significant.                                                                                                                        |
| Lagergren et al. 2000 [54] | 1995-1997<br>SE             | Population-based case-control | 189 | 820   | To examine the association between smoking, snuff, and alcohol use and development of EAC. | Face-to-face interview.                                                                                      | Weak or absent association considering the interaction between tobacco smoking and alcohol and EAC risk.                                                                          |
|                            | 1995-1997                   |                               | 189 | 820   |                                                                                            |                                                                                                              |                                                                                                                                                                                   |







|                            |           |                               |     |       |                                                                           |                                                                                                                                 |                                                                                                                                                                                                                                                                           |
|----------------------------|-----------|-------------------------------|-----|-------|---------------------------------------------------------------------------|---------------------------------------------------------------------------------------------------------------------------------|---------------------------------------------------------------------------------------------------------------------------------------------------------------------------------------------------------------------------------------------------------------------------|
|                            |           |                               |     |       |                                                                           | (adapted for the Irish population) relating to a period of 5 years before interview.                                            | with EAC. Heme iron was positively associated with EAC                                                                                                                                                                                                                    |
| O'Doherty et al. 2011 [74] | 2002-2005 | Case-control                  | 224 | 256   | Association between dietary fat and meat intake with EAC.                 | Structured computerized 101-item EPIC-FFQ, (adapted for the Irish population) relating to a period of 5 years before interview. | High intakes of total fat, saturated fat, monounsaturated fat and fresh red meat were associated with higher risk of EAC.                                                                                                                                                 |
|                            | IE        |                               |     |       |                                                                           |                                                                                                                                 |                                                                                                                                                                                                                                                                           |
| Olsen et al. 2011 [75]     | 2002-2005 | Population-based case-control | 364 | 1,580 | Population attributable fractions of EAC associated with BMI and smoking. | Self-administered questionnaire                                                                                                 | BMI $\geq$ 30 and frequent acid reflux accounted for the greatest proportions of EAC. Total Population Attributable Fraction (PAF) associated with smoking, BMI, and symptoms of GERD was higher for men (78% v. 59% women), although the difference was not significant. |
|                            | AU        |                               |     |       |                                                                           |                                                                                                                                 |                                                                                                                                                                                                                                                                           |
| Pandeya N et al. 2008 [76] | 2002-2005 | Population-based case-control | 367 | 1,580 | Association of duration, intensity, and smoking quantity with EAC.        | A self-completed health and lifestyle questionnaire.                                                                            | Smoking and duration of smoking were significantly associated with EAC; however, intensity was not. Time since quitting was independently associated with an approximate 15% risk reduction per decade.                                                                   |
|                            | AU        |                               |     |       |                                                                           |                                                                                                                                 |                                                                                                                                                                                                                                                                           |
| Pandeya et al. 2009 [77]   | 2002-2005 | Population-based case-control | 365 | 1,580 | Relation between alcohol intake and EAC risk.                             | A self-completed health and lifestyle questionnaire.                                                                            | No association between alcohol and EAC. No significant interaction between smoking and alcohol. Beer was not associated with EAC risk. Modest intake of wine reduced EAC risk.                                                                                            |
|                            | AU        |                               |     |       |                                                                           |                                                                                                                                 |                                                                                                                                                                                                                                                                           |
| Pandeya et al. 2010 [78]   | 2002-2005 | Population-based case-control | 365 | 1,580 | Relation between smoking and EAC risk in patients with GERD.              | A self-completed health and lifestyle questionnaire.                                                                            | GERD was associated with a 6.4-fold increase in EAC risk. Heavy smokers had a markedly high EAC risk.                                                                                                                                                                     |
|                            | AU        |                               |     |       |                                                                           |                                                                                                                                 |                                                                                                                                                                                                                                                                           |
|                            | 1993-1995 |                               | 274 | 662   |                                                                           |                                                                                                                                 |                                                                                                                                                                                                                                                                           |



|                          |           |                                           |     |                                 |                                                                                                 |                                                                                                                      |                                                                                                                                                                                                                                                                                                   |
|--------------------------|-----------|-------------------------------------------|-----|---------------------------------|-------------------------------------------------------------------------------------------------|----------------------------------------------------------------------------------------------------------------------|---------------------------------------------------------------------------------------------------------------------------------------------------------------------------------------------------------------------------------------------------------------------------------------------------|
| Petrick et al. 2015 [79] | US        | Multicenter population-based              |     |                                 | Association between intakes of total flavonoids and lignans, and the incidence of EAC.          | 104-item face-to-face structured FFQ evaluating diet 3-5 years before EAC diagnosis or before the control interview. | Little or no consistent association was found between total flavonoid intake and the incidence of EAC. Anthocyanidins was associated with a reduction in the risk of EAC and mortality from.                                                                                                      |
| Pohl et al. 2013 [80]    | 2005-2009 | Case-control                              | 100 | No-GERD (n=113)<br>GERD (n=188) | To examine at what stage known risk factors exert their influence toward EAC progression.       | Standardized questionnaire                                                                                           | Increasing BMI at age 40 showed a small, but significant, association with EAC. Fruits and vegetables showed a strong protective effect. Duration of smoking and timing of the largest meal during the day was not associated with EAC. Any history of smoking was associated with a risk of EAC. |
|                          | DE        |                                           |     |                                 |                                                                                                 |                                                                                                                      |                                                                                                                                                                                                                                                                                                   |
| Ryan et al. 2006 [81]    | 1994-2004 | Prospective case-control                  | 936 | 893                             | Relation between BMI and obesity and EAC risk.                                                  | Registered dietitian assessed every patient individually.                                                            | A high pre-illness BMI significantly raises the risk of EAC, with a dose-dependent relationship.                                                                                                                                                                                                  |
|                          | IE        |                                           |     |                                 |                                                                                                 |                                                                                                                      |                                                                                                                                                                                                                                                                                                   |
| Sharp et al. 2013 [82]   | 2002-2005 | Case-control matched study                | 223 | 223                             | Association between dietary folate and risk of EAC.                                             | Structured interviews and completed food-frequency questionnaires.                                                   | EAC risk decreased with increasing folate and Vitamin B-6 intake. Vitamin B-12 intake increased EAC risk.                                                                                                                                                                                         |
|                          | IE        |                                           |     |                                 |                                                                                                 |                                                                                                                      |                                                                                                                                                                                                                                                                                                   |
| Terry et al. 2000 [83]   | 1995-1997 | Nationwide, population-based case-control | 185 | 815                             | Relation between vitamin C, $\beta$ -carotene, and $\alpha$ -tocopherol intake and risk of EAC. | 63-item FFQ in computer-aided face-to-face interviews. Usual intake 20y before the interview.                        | Vitamin C and $\beta$ -carotene intake was inversely associated with EAC risk. $\alpha$ -tocopherol was not associated. Parallel dietary intake of vitamin C, Alpha-tocopherol, and $\beta$ -carotene decrease the risk of EAC. No risk reduction with vitamin supplementation.                   |
|                          | SE        |                                           |     |                                 |                                                                                                 |                                                                                                                      |                                                                                                                                                                                                                                                                                                   |
| Terry et al. 2001 [84]   | 1995-1997 | Nationwide, population-based case-control | 185 | 815                             | Association between fruit and vegetable consumption and the risk of EAC.                        | 63-item FFQ in computer-aided face-to-face interviews. Usual intake 20y before the interview.                        | Fruits and vegetables reduced the risk of EAC. There were no significant associations between any specific fruit or vegetable and EAC.                                                                                                                                                            |
|                          | SE        |                                           |     |                                 |                                                                                                 |                                                                                                                      |                                                                                                                                                                                                                                                                                                   |
| Terry et al. 2003 [85]   | 1995-1997 | Nationwide, population-                   | 185 | 815                             | Relation between heterocyclic amine                                                             | 63-item FFQ in computer-aided face-to-face interviews;                                                               | No association was found between heterocyclic amine intakes and the risk of EAC.                                                                                                                                                                                                                  |
|                          | SE        |                                           |     |                                 |                                                                                                 |                                                                                                                      |                                                                                                                                                                                                                                                                                                   |

|                            |                                                                                                          |                                         |                 |       |                                                                                |                                                                                                                                                                             |                                                                                                                                                                            |
|----------------------------|----------------------------------------------------------------------------------------------------------|-----------------------------------------|-----------------|-------|--------------------------------------------------------------------------------|-----------------------------------------------------------------------------------------------------------------------------------------------------------------------------|----------------------------------------------------------------------------------------------------------------------------------------------------------------------------|
|                            |                                                                                                          | based case-control                      |                 |       | intake and risk of EAC                                                         | usual intake 20y before the interview; questions on specific foods and cooking methods.                                                                                     |                                                                                                                                                                            |
| Thrift et al. 2014 [86]    | BEAGESS (data from 14 epidemiological studies conducted in Western Europe, Australia, and North America) | Case-control Mendelian approach         | 999             | 2,169 | To improve the precision of causal estimates between BMI and EAC.              | Genetic data sourced from genome-wide association studies (GWAS).                                                                                                           | EAC risk increased by 16% per BMI increase of 1 kg/m2.                                                                                                                     |
| Tzonou et al. 1996 [87]    | 1989-1991 GR                                                                                             | Case-control                            | 56              | 200   | To identify dietary risk factors for EAC.                                      | 115-item validated semi-quantitative FFQ.                                                                                                                                   | Added polyunsaturated fats are positively associated with EAC risk. Intake of vegetables, fruits, vitamin C, crude fiber, and vitamin A was inversely associated with EAC. |
| Veugelers et al. 2006 [88] | 2001-2003 CA                                                                                             | Prospective hospital-based case-control | 57              | 102   | Relation between obesity, diet, smoking, and alcohol consumption and EAC risk. | 102-point face- to- face interview; 150-item structured FFQ.                                                                                                                | BMI and smoking were risk factors for EAC. Vitamin C was associated with a lower risk of EAC. Liquor was not a risk factor for EAC.                                        |
| Vigen, C. et al. 2006 [89] | n.a.                                                                                                     | Population-based case-control           | 212             | 1,330 | Relation between occupational physical activity and EAC.                       | In-person interviews and total lifetime occupational activity were calculated using US Census job codes classified as sedentary, or moderately or highly physically active. | EAC risk decreases with an increase in the Total Activity Index (OR = 0.67, 95% CI = 0.38,1.19 for highest versus lowest quartile).                                        |
| Ward et al. 1997 [90]      | 1992-1994 US                                                                                             | Population-based case-control           | 137 whites only | 502   | Association between meat and gravy intake, meat                                | Telephone interview; HHHQ                                                                                                                                                   | Processed and red meats increased risk of EAC. Consumption of gravy $\geq 4$ times/week was associated with more                                                           |



|                     |           |                                     |     |       |                                                                                                                                                                                             |                                                                                                         |                                                                                                                                                                                                                                     |
|---------------------|-----------|-------------------------------------|-----|-------|---------------------------------------------------------------------------------------------------------------------------------------------------------------------------------------------|---------------------------------------------------------------------------------------------------------|-------------------------------------------------------------------------------------------------------------------------------------------------------------------------------------------------------------------------------------|
|                     |           |                                     |     |       | dietary patterns and EAC risk.                                                                                                                                                              | Personal interview on nutritional habits using the EBIS computer program.                               | with EAC. > 1,300 mg/day of calcium, > 500 mg/day of magnesium, and 18 mg/day of iron were inversely correlated with EAC. Dietary fiber, carbohydrates, and fruits were significantly higher in controls than in patients with EAC. |
| Wu et al 2007 [96]  | 1992-1997 | Case-control                        | 206 | 1,308 | Relation between dietary fat and fiber intake and risk of EAC. To investigate risk associated with the intake of total meat, red meat, poultry, fish/shellfish, and processed meat and EAC. | 124-item food and beverage in-person interviews. Question on the use of dietary supplements also added. | Total fat, saturated and monounsaturated fat, increased the risk of EAC, but not the polyunsaturated fat. Total fiber reduced the risk. Total meat or processed meat intake, poultry and fish/shellfish were unrelated to EAC risk. |
|                     | US        |                                     |     |       |                                                                                                                                                                                             |                                                                                                         |                                                                                                                                                                                                                                     |
| Wu et al. 2001 [95] | 1992-1997 | Large population-based case-control | 222 | 1,356 | Relation between BMI, alcohol, and cigarette smoking and EAC risk.                                                                                                                          | Structured questionnaire                                                                                | Smoking was a risk factor for EAC. Smoking cessation did not reduced the risk. Alcohol was not associated with EAC risk. BMI at ages 20 and 40 years increased the risk in a dose-dependent manner.                                 |
|                     | US        |                                     |     |       |                                                                                                                                                                                             |                                                                                                         |                                                                                                                                                                                                                                     |

Abbreviations: AU, Australia; BEAGESS, Barrett's and Esophageal Adenocarcinoma Genetic Susceptibility Study; BMI, Body Mass Index; CA, Canada; CI, Confidence Interval; CN, China; CSDs, Carbonated Soft Drinks; CT, Computed Tomography; CZ, Czech Republic; DE, Germany; DII, Dietary Inflammation Index; EAC, Esophageal Adenocarcinoma; EPIC, European Prospective Investigation into Cancer and Nutrition; FFQ, Food Frequency Questionnaire; GERD, Gastroesophageal Reflux Disease; GI, Glycemic Index; GL, Glycemic Load; GPRD, General Practice Research Database; GR, Greece; HHHQ, Health Habits and History Questionnaire; IE, Ireland; LBS, Pounds; MetS, Metabolic Syndrome; Mg, Magnesium; NCL, National Cancer Institute; NL, Netherlands; OR, Odds Ratio; PL, Poland; RO, Romania; RU, Russia; RR, Relative Risk; SE, Sweden; UK, United Kingdom; US, United States, y, years.

**Supplementary Table S2.** Characteristics of included cohort and cross-sectional studies, in alphabetical order.

| Author<br>Year [Ref]    | Study<br>Period<br>Country  | Study Design                               | EAC<br>Cases<br>(n) | Study<br>Population<br>(n) | Aims                                                                                                                | Data                                                                                                                     | Main Results                                                                                                                                                                                                                                  |
|-------------------------|-----------------------------|--------------------------------------------|---------------------|----------------------------|---------------------------------------------------------------------------------------------------------------------|--------------------------------------------------------------------------------------------------------------------------|-----------------------------------------------------------------------------------------------------------------------------------------------------------------------------------------------------------------------------------------------|
| Abnet et al. 2008 [97]  | 1995-1996<br>(7y FU)<br>US  | Cohort<br>(NIH-AARP Diet and Health Study) | 371                 | 480,475                    | Evaluating the association between BMI and risk of developing EAC.                                                  | Mailed questionnaire on demographics, dietary intake and health-related behaviors.                                       | BMI categories greater than normal had significant and progressively greater risk.                                                                                                                                                            |
| Allen et al. 2009 [98]  | 1996-2001<br>(7y FU)<br>UK  | Cohort<br>(The Million Women Study)        | 226                 | 1,280,296                  | Association between moderate alcohol intake and risk of EAC in women.                                               | Questionnaire without any other details.                                                                                 | Alcohol was not associated with EAC.                                                                                                                                                                                                          |
| Carman et al. 2009 [99] | 1995-1996<br>(7y FU)<br>US  | Cohort<br>(NIH-AARP Diet and Health Study) | 382                 | 492,559                    | Association of dietary $\alpha$ -tocopherol, $\gamma$ -tocopherol, and supplemental vitamin E with the risk of EAC. | 124-item FFQ                                                                                                             | Dietary $\alpha$ -tocopherol and $\gamma$ -tocopherol were not associated with EAC. Supplemental Vitamin E was no associated with EAC.                                                                                                        |
| Cook et al. 2013 [100]  | 1995-1996<br>(10y FU)<br>US | Cohort<br>(NIH-AARP Diet and Health Study) | 631                 | 303,033                    | To investigate the relationship between physical activity, sedentary behavior, and EAC.                             | Self-administered baseline questionnaire. Mailed risk factor questionnaire (after 6 months from baseline).               | Inverse association between sedentary behavior and EAC.                                                                                                                                                                                       |
| Cross et al. 2011 [101] | 1995-1996<br>(10y FU)<br>US | Cohort<br>(NIH-AARP Diet and Health Study) | 630                 | 494,979                    | To investigate the relationship between meat and meat-related variables and EAC.                                    | Self-administered baseline questionnaire. 124-item FFQ. Mailed risk factor questionnaire (after 6 months from baseline). | Red meat, white meat and processed meat consumption, was not associated with EAC. A high HCA intake was associated with borderline statistically increased risk of EAC. Positive association between heme iron intake and EAC. No association |

|                            |                                      |                                                     |     |           |                                                                                              |                                                                                   |                                                                                                           |
|----------------------------|--------------------------------------|-----------------------------------------------------|-----|-----------|----------------------------------------------------------------------------------------------|-----------------------------------------------------------------------------------|-----------------------------------------------------------------------------------------------------------|
|                            |                                      |                                                     |     |           |                                                                                              |                                                                                   | between B[a]P, nitrate, or nitrite and EAC.                                                               |
| Dawsey et al. 2014 [102]   | 1995-1996<br>(10y FU)<br>US          | Cohort<br>(NIH-AARP Diet and Health Study)          | 625 | 490,593   | To investigate the association between multivitamins and other supplements and EAC.          | Self-administered baseline questionnaire.                                         | Multivitamin and calcium supplements increased EAC risk in smokers. Iron supplement reduced the EAC risk. |
| de Jonge et al. 2007 [103] | 2002-2005<br>NL                      | Cross-sectional                                     | 126 | 226       | To investigate the relation between environmental risk factors and EAC.                      | Standard questionnaire                                                            | BMI and a smoking habit increased EAC risk in males.                                                      |
| Engeland et al. 2004 [104] | 1963-2001<br>NO                      | Cohort                                              | 575 | 2,001,617 | To investigate the association between BMI, stature, and cancer.                             | Height and weight measured by trained staff.                                      | Being overweight and obese increased EAC risk.                                                            |
| Freedman et al. 2007 [105] | 1995-1996<br>(5y FU)<br>US           | Prospective cohort (NIH-AARP Diet and Health Study) | 205 | 474,606   | To investigate the association between tobacco, alcohol, and the risk of EAC.                | Self-administered validated questionnaires concerning alcohol intake and tobacco. | Current and former cigarette smoking increased risk of EAC. Alcohol was not associated with EAC.          |
| Freedman et al. 2007 [106] | 1995-1996<br>(5y FU)<br>US           | Cohort<br>(NIH-AARP Diet and Health Study)          | 213 | 490,802   | To investigate the association between fruit and vegetable consumption and the risk of EAC.  | Self-administered baseline questionnaire 124-item FFQ                             | Fruit and vegetable were not associated with EAC. Spinach reduced EAC risk.                               |
| Gatenby et al. 2008 [107]  | 1996-2004<br>UK                      | Hospital-based prospective cohort                   |     | 1,651     | To investigate the association between demographic characteristics, lifestyle, and EAC risk. | Information from patient hospital records.                                        | No association between gender, smoking habits, alcohol consumption and the incidence of EAC.              |
| Gonzalez et al. 2006 [108] | 1992-1998<br>DK, FR, DE, GR, IT, NL, | EPIC - Cohort                                       | 65  | 481,518   | To describe the effect of fruit and vegetable                                                | 12-month previous country-                                                        | Negative with a non-significant association for vegetable intake and citrus intake.                       |

|                                  | NO, ES, SE,<br>UK                                      |                                                                           |     |                        | intake on the risk of<br>EAC.                                                                                                | specific validated<br>FFQ.                                                                                                    |                                                                                                                                                                                        |
|----------------------------------|--------------------------------------------------------|---------------------------------------------------------------------------|-----|------------------------|------------------------------------------------------------------------------------------------------------------------------|-------------------------------------------------------------------------------------------------------------------------------|----------------------------------------------------------------------------------------------------------------------------------------------------------------------------------------|
| Gonzalez<br>et al. 2006<br>[109] | 1992 -2002<br>DK, FR, DE,<br>GR, IT, NL,<br>ES, SE, UK | EPIC - Cohort                                                             | 65  | 481,518                | To investigate the<br>risk of EAC<br>associated with the<br>consumption of meat<br>and processed meat.                       | 12-month<br>previous country-<br>specific validated<br>FFQ.                                                                   | Positive but no statistically<br>significant association between<br>EAC risk and total and<br>processed meat intake. Poultry<br>reduced the risk of EAC.                               |
| Hardikar<br>et al. 2013<br>[110] | 1995-2009<br>US                                        | Prospective<br>cohort<br>(Seattle Barrett's<br>Esophagus<br>Study – SBES) | 45  | 411                    | Association between<br>smoking, school, and<br>obesity and EAC.                                                              | Structured<br>personal 45-<br>minute interview.                                                                               | Smoking duration increased<br>EAC risk. Alcohol and BMI did<br>not.                                                                                                                    |
| Huerta et<br>al. 2010<br>[111]   | 1991-2005<br>DK, FR, DE,<br>GR, IT, NL,<br>ES, SE, UK  | Prospective<br>cohort (EPIC)                                              | 80  | 420,449                | To investigate the<br>association between<br>physical activity and<br>EAC.                                                   | Validated<br>questionnaires;<br>CPAI.                                                                                         | Physical activity was not<br>associated with EAC.                                                                                                                                      |
| Jakszyn et<br>al. 2013<br>[112]  | FR, IT, ES,<br>UK, NL, SE,<br>DE, DK                   | Prospective<br>cohort (EPIC)                                              | 137 | 481,419                | To investigate the<br>association between<br>the intake of different<br>types of meats, heme<br>iron intake and EAC<br>risk. | Validated center-<br>specific<br>questionnaires.                                                                              | Heme iron and processed red<br>meat increased EAC risk, but not<br>white and unprocessed meat<br>(based on tertiles of intake), but<br>not when continuous variable<br>was considered. |
| Ji et al.<br>2017 [113]          | 1973-2010<br>SE                                        | Retrospective<br>cohort                                                   | 145 | 420,489                | To investigate the<br>association of alcohol<br>consumption with<br>EAC.                                                     | Swedish Hospital<br>Discharge<br>Register and<br>Outpatient<br>Register; Crime<br>Register;<br>Prescription Drug<br>Register. | Subjects with alcohol use<br>disorders (heavy alcohol<br>drinkers) had an increased risk<br>of EAC.                                                                                    |
| Keszei et<br>al. 2012<br>[114]   | 1986-2002<br>NL                                        | Case-cohort<br>The<br>Netherlands<br>Cohort Study<br>(NLCS)               | 145 | 3,921 (sub-<br>cohort) | To investigate the<br>association between<br>red and processed<br>meat and the risk of<br>EAC.                               | Self-administered<br>baseline<br>questionnaire<br>with a 150-item<br>questionnaire on                                         | No association between EAC<br>risk and red meat and processed<br>meat intake.                                                                                                          |

|                          |                              |                                                    |     |                    |                                                                                                                  |  |                                                                                                                                                          |                                                                                                                                               |
|--------------------------|------------------------------|----------------------------------------------------|-----|--------------------|------------------------------------------------------------------------------------------------------------------|--|----------------------------------------------------------------------------------------------------------------------------------------------------------|-----------------------------------------------------------------------------------------------------------------------------------------------|
|                          |                              |                                                    |     |                    |                                                                                                                  |  | food and beverage consumption during the year prior to the start of the study.                                                                           |                                                                                                                                               |
| Keszei et al. 2013 [115] | 1986-2002<br>NL              | Case-cohort<br>The Netherlands Cohort Study (NLCS) | 151 | 4,032 (sub-cohort) | Relation between the risk of EAC and dietary intake of N-nitroso-dimethylamine, heme iron, nitrite, and nitrate. |  | Self-administered baseline questionnaire with a 150-item questionnaire on food and beverage consumption during the year prior to the start of the study. | No associations between N-nitroso compounds and EAC risk.                                                                                     |
| Levi et al. 2013 [116]   | 1967-2006<br>IL              | Cohort                                             | 28  | 1,088,242          | To investigate the association between BMI in late adolescence, SES and ethnic factors and EAC incidence.        |  | Measured height and weight; Israeli Central Bureau of Statistics; Israel National Cancer Registry.                                                       | Risk of EAC was not significantly increased in subject with BMI ≥85 <sup>th</sup> percentile. No association between SES, ethnicity, and EAC. |
| Li et al. 2013 [117]     | 1995-2006<br>US              | Cohort (NIH-AARP Diet and Health Study)            | 633 | 494,968            | To investigate the association between HEI-2005, aMED and the risk of EAC                                        |  | 124-food item FFQ; HEI-2005 aMED; Social Security Administration; Death Master File; Cancer registers.                                                   | Higher HEI-2005 was significantly associated with a reduced risk of EAC. No association between the aMED score and the risk of EAC.           |
| Lin et al. 2015 [118]    | 1995-1997<br>2006-2008<br>NO | Cohort<br>CONOR and HUNT3                          | 62  | 192,903            | To investigate the role of the metabolic syndrome and WC.                                                        |  | Anthropometric data measured objectively.                                                                                                                | MetS was not associated with EAC, whilst a high WC was associated with an increased risk of EAC.                                              |
|                          | 1986-1999                    | Prospective cohort                                 | 133 | 4,552 sub-cohort   |                                                                                                                  |  | Self-administered questionnaire on                                                                                                                       | BMI was associated with EAC risk. Change in BMI during                                                                                        |



|                             |                              |                                                                                                          |     |               |                                                                                                  |                                                                                                           |                                                                                                                                                                     |
|-----------------------------|------------------------------|----------------------------------------------------------------------------------------------------------|-----|---------------|--------------------------------------------------------------------------------------------------|-----------------------------------------------------------------------------------------------------------|---------------------------------------------------------------------------------------------------------------------------------------------------------------------|
| Merry et al. 2007 [119]     | NL                           | (The Netherlands Cohort Study on Diet and Cancer)                                                        |     |               | To investigate the association between BMI and EAC risk.                                         | usual dietary intake, anthropometry, smoking habits, physical activity, education, and history of cancer. | adulthood was positively associated with the risk of EAC. No association with BMI in early adulthood.                                                               |
| O'Doherty et al. 2012 [120] | 1995-2006<br>US              | Cohort (NIH-AARP Diet and Health Study)                                                                  | 630 | 494,978       | To investigate the association between total fat and fat subtype intake and EAC.                 | Baseline questionnaire; 124-food item FFQ.                                                                | No consistent associations between total fat intake and fat subtypes with risk of EAC. Protective role of polyunsaturated fat intake in subjects with a normal BMI. |
| O'Doherty et al. 2012 [121] | 1995-2006<br>US              | Cohort (NIH-AARP Diet and Health Study)                                                                  | 253 | 218,854       | To investigate the relation between height, BMI, and abdominal obesity with EAC.                 | Baseline questionnaire; Risk factor questionnaire.                                                        | BMI $\geq$ 35, WC and WHR increased the risk of EAC.                                                                                                                |
| Petrack et al. 2017 [122]   | 1995-1996<br>US              | NIH-AARP Diet and Health Study and Prostate, Lung, Colorectal, and Ovarian (PLCO) Cancer Screening Trial | 633 | 409,796       | To assess the effects of adiposity over the life course and EAC.                                 | Self-reported anthropometric data.                                                                        | Being overweight in early adulthood and weight gain later in life were also associated with an increased risk of EAC.                                               |
| Reeves et al. 2007 [123]    | 1996-2001<br>(5.4y FU)<br>UK | Million Women Study                                                                                      | 150 | 1,222,630     | To examine the relation between BMI and EAC.                                                     | Self-reported anthropometric data.                                                                        | Increasing BMI is associated with a higher risk of EAC.                                                                                                             |
| Ren et al. 2010 [124]       | 1995-1996<br>(13y FU)<br>US  | NIH-AARP Diet and Health Study                                                                           | 305 | 566,407       | To investigate the relation between hot beverages, tea, coffee, carbonated soft drinks, and EAC. | Baseline questionnaire; Risk factor questionnaire.                                                        | No significant association with hot beverages, tea, coffee, and carbonated soft drinks.                                                                             |
|                             | 1971-1999                    | Cohort                                                                                                   | 82  | 362,552 males |                                                                                                  |                                                                                                           | High BMI increased risk of EAC.                                                                                                                                     |

|                            |                                                                |                                                      |     |              |      |                                                                                                             |                                                                                                                                                                                                     |                                                                                                                                                                                                                                                               |
|----------------------------|----------------------------------------------------------------|------------------------------------------------------|-----|--------------|------|-------------------------------------------------------------------------------------------------------------|-----------------------------------------------------------------------------------------------------------------------------------------------------------------------------------------------------|---------------------------------------------------------------------------------------------------------------------------------------------------------------------------------------------------------------------------------------------------------------|
| Samanic et al. 2006 [125]  | SE                                                             |                                                      |     |              |      | To examine the relationship between being overweight, obesity, and EAC risk.                                | Measured weight and height. Population-based Swedish cancer registry.                                                                                                                               |                                                                                                                                                                                                                                                               |
| Sanikini et al. 2020 [126] | 10 European countries (DK, FR, DE, GR, IT, NO, ES, SE, NL, UK) | Cohort EPIC                                          | 220 | 476,16       |      | To investigate anthropometric factors in relation to EAC.                                                   | Anthropometric measurements were taken at recruitment by trained health professionals.                                                                                                              | WC and WHR were associated with a higher risk of EAC in both men and women.                                                                                                                                                                                   |
| Steevens et al. 2010 [127] | 1986-2002 NL                                                   | Cohort (Netherlands Cohort Study on diet and cancer) | 145 | 3,962 cohort | sub- | To investigate the association between alcohol consumption, cigarette smoking, and the risk of EAC.         | Self-administered questionnaire with a 150-item food FFQ.                                                                                                                                           | No association between total alcohol and type of alcoholic beverage consumption and EAC risk. Frequency and pack-years of smoking were independently associated with risk of EAC. Risk reduction for smoking cessation and EAC was statistically significant. |
| Steevens et al. 2010 [128] | 1986-2002 NL                                                   | Cohort (Netherlands Cohort Study on diet and cancer) | 129 | 2,072 cohort | sub- | To prospectively investigate the association between prediagnostic toenail selenium levels and risk of EAC. | Self-administered questionnaire with a 150-item FFQ and questions on cancer risk factors (smoking habits, alcohol consumption, height, and weight). Toenail clippings for selenium determination by | Inverse association between selenium status and risk of EAC in subgroups (women; never smokers; low antioxidant consumers).                                                                                                                                   |

|                            |                                         |                                                      |     |                |      |                                                                                                            |                                                                                                                                                                              |                                                                                                                                                                                                                                                                 |
|----------------------------|-----------------------------------------|------------------------------------------------------|-----|----------------|------|------------------------------------------------------------------------------------------------------------|------------------------------------------------------------------------------------------------------------------------------------------------------------------------------|-----------------------------------------------------------------------------------------------------------------------------------------------------------------------------------------------------------------------------------------------------------------|
|                            |                                         |                                                      |     |                |      |                                                                                                            | neutron activation analysis of the <sup>77</sup> Se isotope.                                                                                                                 |                                                                                                                                                                                                                                                                 |
| Steevens et al. 2011 [129] | 1986-2002<br>NL                         | Cohort (Netherlands Cohort Study on diet and cancer) | 144 | 4,035 cohort   | sub- | To prospectively investigate the role of vegetable and fruit consumption in the development of EAC.        | National Cancer Registry Nationwide Network; Registry of Histopathology and Cytopathology in the Netherlands; Self-administered questionnaire with a 150-item food FFQ.      | Significant inverse associations were observed for raw vegetables, citrus fruits and EAC risk. Total fruit consumption was associated with a non-significant decrease in EAC risk. In current smokers only, vegetables were inversely associated with EAC risk. |
| Steffen et al. 2009 [130]  | 1992-2007<br>DK, DE, IT, NL, ES, SE, UK | EPIC - Cohort                                        | 124 | 391,456 cohort | Sub- | To evaluate the relation between body height and general and abdominal obesity, with the incidence of EAC. | Directly measured weight, height, waist circumference, and hip circumference; non-dietary questionnaires for lifestyle and health-related information; country-specific FFQ. | BMI, high WC, and high WHR were statistically positively related to the risk of EAC. Body height was not associated with the risk of EAC. BMI and WC may be strongly associated with the risk of EAC in smokers, rather than in non-smokers.                    |
| Steffen et al. 2015 [131]  | 1993-2008<br>DK, DE, IT, NL, ES, SE, UK | EPIC - Cohort                                        | 88  | 346,544 cohort | sub- | Association of anthropometric measures with risk of EAC.                                                   | Directly measured weight, height, waist circumference, and hip circumference; Lifestyle                                                                                      | BMI was unrelated to EAC. WC showed a strong positive association with EAC risk. Hip circumference (HC) was inversely related to EAC after controlling for WC Protective effect of gluteofemoral                                                                |

|                              |                                                     |                                         |     |         |                                                                                                                                       |                                                                                                                                                                 |                                                                                                                                                                                                                    |
|------------------------------|-----------------------------------------------------|-----------------------------------------|-----|---------|---------------------------------------------------------------------------------------------------------------------------------------|-----------------------------------------------------------------------------------------------------------------------------------------------------------------|--------------------------------------------------------------------------------------------------------------------------------------------------------------------------------------------------------------------|
|                              |                                                     |                                         |     |         |                                                                                                                                       | questionnaires for lifestyle and health-related information; country-specific FFQ.                                                                              | (subcutaneous) adipose tissue in EAC.                                                                                                                                                                              |
| Vermeulen et al. 2013 [132]  | 1992-2010<br>DK, FR, DE, GR, IT, NO, NL, ES, SE, UK | EPIC - Cohort                           | 142 | 477,312 | To investigate the association between dietary flavonoid intake and EAC risk.                                                         | Validated dietary country-specific questionnaires.                                                                                                              | No statistically significant association between any flavonoid subclass and EAC.                                                                                                                                   |
| Xiao et al. 2014 [134]       | 1995-2006<br>US                                     | Cohort (NIH-AARP Diet and Health Study) | 574 | 492,292 | To investigate the association between folate, methionine, vitamin B6, and vitamin B12 intake and EAC risk.                           | Self-administered 124-item FFQ.                                                                                                                                 | Higher intakes of folate, methionine, vitamin B6, or vitamin B12 were not associated with EAC risk. No association between total folate (diet+supplements) intake and EAC risk.                                    |
| Yates et al. 2014 [133]      | 1993-2008<br>UK                                     | EPIC-Norfolk Cohort                     | 66  | 24,068  | To investigate the relation between smoking, BMI, alcohol consumption and EAC risk.                                                   | EPIC questionnaire.                                                                                                                                             | BMI greater than 23 kg/m <sup>2</sup> was associated with an increased risk of EAC. Statistically significant increased risk in subjects with a BMI >35. Inverse association with ≥7 units alcohol/week from wine. |
| Zamora-Ros et al. 2014 [135] | 1992-2010<br>DK, FR, DE, GR, IT, NL, ES, SE, UK     | EPIC - Cohort                           | 339 | 442,143 | To investigate the relationship between tea (mainly black tea) and coffee (total, caffeinated and decaffeinated) intake and EAC risk. | Validated dietary country-specific questionnaires; personal interview (GR, ES, Ragusa); short non-quantitative FFQ + 7-day dietary diary (SE); questionnaire on | No statistically significant association between the intake of tea, mainly black tea, and coffee and EAC risk.                                                                                                     |

|                             |                 |                      |     |         |                                                                                                 |                                                                                                                                                                                                                      |                                                                                                                                             |
|-----------------------------|-----------------|----------------------|-----|---------|-------------------------------------------------------------------------------------------------|----------------------------------------------------------------------------------------------------------------------------------------------------------------------------------------------------------------------|---------------------------------------------------------------------------------------------------------------------------------------------|
|                             |                 |                      |     |         |                                                                                                 | sociodemographic characteristics; questionnaire on physical activity and leisure time; directly measured weight and height (except in UK and FR); information on coffee and tea consumption (only in DE, NL, and UK) |                                                                                                                                             |
| Zendehdel et al. 2008 [136] | 1971-2004<br>SE | Retrospective cohort | 130 | 336,381 | To investigate the relation between smokers and users of Scandinavian moist snuff and EAC risk. | 200-item questionnaire                                                                                                                                                                                               | The use of snus was not statistically significant for EAC risk. Compared to never-users of any tobacco, smokers had increased risks of EAC. |

Abbreviations: **aMED**, Alternate Mediterranean Diet; **AU**, Australia; **B[a]P**, Benzo[a]pyrene; **BEAGESS**, Barrett's and Esophageal Adenocarcinoma Genetic Susceptibility Study; **BMI**, Body Mass Index; **EAC**, Esophageal Adenocarcinoma; **CPAI**, Cambridge Physical Activity Index; **CA**, Canada; **Ca**, calcium; **CI**, Confidence Interval; **CN**, China; **CSDs**, Carbonated Soft Drinks; **CT**, Computed Tomography; **CZ**, Czech Republic; **CONOR**: Cohort of Norway; **DE**, Germany; **DII**, Dietary Inflammation Index; **EAC**, Esophageal Adenocarcinoma; **EPIC**, European Prospective Investigation into Cancer and Nutrition; **FFQ**, Food Frequency Questionnaire; **FU**, follow-up; **GERD**, Gastroesophageal Reflux Disease; **GI**, Glycemic Index; **GL**, Glycemic Load; **GPRD**, General Practice Research Database; **GR**, Greece; **HCAs**, Heterocyclic amines; **HHHQ**, Health Habits and History Questionnaire; **HEI-2005**, Healthy Eating Index-2005; **HUNT3**: third Nord-Trøndelag Health Study; **IE**, Ireland; **LBS**, Pounds; **MetS**, Metabolic Syndrome; **Mg**, Magnesium; **NCL**, National Cancer Institute; **NL**, Netherlands; **OR**, Odds Ratio; **PL**, Poland; **RO**, Romania; **RU**, Russia; **RR**, Relative Risk; **SE**, Sweden; **SES**, Socioeconomic Status; **UK**, United Kingdom; **US**, United States; **WC**, Waist circumference; **WHR**, Waist-to-hip ratio, **y**, years.

**Supplementary Table S3.** Quality assessment of case-control studies, using the Newcastle-Ottawa Scale (NOS), in alphabetical order.

| Author Year [Ref]                 | Selection |        |        |        | Comparability |         | Outcome/Exposure <sup>^</sup> |        |        | Total Score/9 |
|-----------------------------------|-----------|--------|--------|--------|---------------|---------|-------------------------------|--------|--------|---------------|
|                                   | Item 1    | Item 2 | Item 3 | Item 4 | Item 5a       | Item 5b | Item 6                        | Item 7 | Item 8 |               |
| Anderson, et al. 2009 [31]        | *         | *      | *      | -      | *             | *       | *                             | *      | -      | 7             |
| Anderson, et al. 2007 [32]        | *         | *      | *      | *      | *             | *       | -                             | *      | -      | 7             |
| Bahmanyar, et al. 2006 [33]       | *         | *      | *      | -      | *             | *       | *                             | *      | *      | 8             |
| Bollschweiler, et al. 2002 [34]   | *         | *      | *      | -      | -             | -       | -                             | *      | -      | 4             |
| Chen, et al. 2002 [35]            | -         | -      | -      | -      | *             | *       | -                             | *      | -      | 3             |
| Chen, et al. 2002 [36]            | *         | *      | -      | -      | *             | *       | *                             | *      | *      | 7             |
| Chen, et al. 2011 [37]            | *         | *      | *      | *      | *             | -       | -                             | -      | -      | 5             |
| Cheng, et al. 2000 [38]           | *         | *      | *      | -      | *             | *       | -                             | *      | *      | 7             |
| Chow, et al. 1998 [39]            | *         | *      | *      | *      | *             | *       | *                             | *      | *      | 9             |
| Corley, et al. 2008 [40]          | *         | -      | *      | *      | *             | *       | *                             | *      | *      | 8             |
| Dai, et al. 2016 [41]             | *         | *      | *      | *      | *             | *       | -                             | *      | -      | 7             |
| de Jonge, et al. 2006 [42]        | *         | *      | -      | *      | *             | *       | -                             | *      | *      | 7             |
| Drahos, et al. 2016 [43]          | *         | *      | *      | *      | *             | *       | *                             | *      | -      | 8             |
| Duan, et al. 2009 [44]            | *         | *      | -      | -      | *             | *       | -                             | *      | -      | 5             |
| Engel, et al. 2003 [45]           | *         | *      | *      | -      | *             | *       | -                             | *      | *      | 7             |
| Gammon, et al. 1997 [46]          | *         | *      | *      | -      | *             | *       | -                             | *      | *      | 7             |
| Gao, et al. 1994 [47]             | *         | *      | *      | -      | *             | *       | -                             | *      | -      | 6             |
| Garidou, et al. 1996 [48]         | *         | *      | -      | -      | *             | *       | -                             | *      | *      | 6             |
| Hashibe, et al. 2007 [49]         | *         | *      | -      | -      | *             | *       | -                             | *      | *      | 6             |
| Ibibebe, et al. 2012 [50]         | *         | *      | *      | -      | *             | *       | *                             | *      | *      | 8             |
| Ibibebe, et al. 2013 [51]         | *         | *      | *      | -      | *             | *       | *                             | *      | *      | 8             |
| Jansson, et al. 2005 [52]         | *         | *      | *      | -      | *             | *       | *                             | *      | -      | 7             |
| Lagergren, et al. 1999 [53]       | *         | *      | *      | *      | *             | *       | -                             | *      | -      | 7             |
| Lagergren, et al. 2000 [54]       | *         | *      | *      | -      | *             | *       | -                             | *      | -      | 6             |
| Lagergren, et al. 2006 [55]       | *         | *      | *      | -      | *             | -       | *                             | *      | *      | 7             |
| Lagergren, et al. 2013 [56]       | *         | *      | *      | -      | *             | *       | -                             | *      | -      | 6             |
| Lagergren, et al. 2014 [57]       | *         | *      | *      | -      | *             | *       | -                             | *      | -      | 6             |
| Lahmann, et al. 2014 [58]         | *         | *      | *      | -      | *             | *       | *                             | -      | -      | 6             |
| Li, et al. 2017 [59]              | *         | *      | *      | -      | *             | *       | *                             | *      | -      | 7             |
| Lin, et al. 2011 [60]             | *         | *      | *      | -      | *             | *       | *                             | *      | -      | 7             |
| Lin, et al. 2014 [61]             | *         | *      | *      | -      | *             | *       | *                             | *      | -      | 7             |
| Lin, et al. 2012 [62]             | *         | *      | *      | -      | *             | *       | -                             | *      | -      | 6             |
| Lindblad, et al. 2005 [63]        | -         | *      | *      | *      | *             | *       | *                             | *      | -      | 7             |
| Lu, et al. 2015 [64]              | *         | *      | *      | -      | *             | *       | *                             | *      | -      | 7             |
| MassI, et al. 2014 [65]           | *         | *      | -      | -      | *             | -       | *                             | *      | -      | 5             |
| Mayne, et al. 2001 [66]           | *         | *      | *      | -      | *             | *       | *                             | *      | *      | 8             |
| Mayne, et al. 2006 [67]           | *         | *      | *      | -      | *             | *       | -                             | *      | -      | 6             |
| Mulholland, et al. 2011 [68]      | *         | *      | *      | *      | *             | *       | -                             | *      | *      | 8             |
| Murphy, et al. 2010 [69]          | *         | *      | *      | *      | *             | *       | -                             | *      | -      | 7             |
| Navarro Silvera, et al. 2014 [72] | *         | *      | *      | -      | *             | *       | *                             | *      | -      | 7             |

|                                   |   |   |   |   |   |   |   |   |   |   |
|-----------------------------------|---|---|---|---|---|---|---|---|---|---|
| Navarro Silvera, et al. 2008 [70] | * | * | * | - | * | * | * | * | - | 7 |
| Navarro Silvera, et al. 2011 [71] | * | * | * | - | * | * | * | * | - | 7 |
| O'Doherty, et al. 2010 [73]       | * | * | * | * | * | * | - | * | - | 7 |
| O'Doherty, et al. 2011 [74]       | * | * | * | * | * | * | - | * | - | 7 |
| Olsen, et al. 2011 [75]           | * | * | * | - | * | * | - | * | - | 6 |
| Pandeya, et al. 2008 [76]         | * | * | * | - | * | * | - | * | - | 6 |
| Pandeya, et al. 2009 [77]         | * | * | * | - | * | * | - | * | - | 6 |
| Pandeya, et al. 2010 [78]         | * | * | * | - | * | * | - | * | - | 6 |
| Petrick, et al. 2015 [79]         | * | * | * | - | * | * | * | * | * | 8 |
| Pohl, et al. 2013 [80]            | * | * | - | * | * | * | - | * | - | 6 |
| Ryan, et al. 2006 [81]            | * | * | * | - | * | * | - | * | - | 6 |
| Sharp, et al. 2013 [82]           | * | - | * | * | * | * | * | * | - | 7 |
| Terry, et al. 2000 [83]           | * | * | * | - | * | * | - | * | * | 7 |
| Terry, et al. 2001 [84]           | * | * | * | - | * | * | - | * | - | 6 |
| Terry, et al. 2003 [85]           | * | * | * | - | * | * | - | * | - | 6 |
| Thrift, et al. 2014 [86]          | * | - | * | * | * | * | * | * | - | 7 |
| Tzonou, et al. 1996 [87]          | * | * | - | - | * | * | * | * | * | 7 |
| Veugelers, et al. 2006 [88]       | * | * | - | - | * | * | - | * | - | 5 |
| Vigen, et al. 2006 [89]           | * | * | * | - | * | * | * | * | - | 7 |
| Ward, et al. 1997 [90]            | * | * | * | - | * | * | - | * | - | 6 |
| Ward, et al. 2012 [92]            | * | * | * | - | * | * | - | * | - | 6 |
| Ward, et al. 2008 [91]            | * | * | * | - | * | * | - | * | * | 7 |
| Whiteman, et al. 2008 [93]        | * | * | * | - | * | * | - | * | - | 6 |
| Wolfgarten, et al. 2001 [94]      | * | * | * | - | - | - | * | * | - | 4 |
| Wu, et al. 2007 [96]              | * | * | * | * | * | * | - | * | - | 7 |
| Wu, et al. 2001 [95]              | * | * | * | * | * | * | - | * | - | 7 |

^based on study design. For case-control the NOS assessed the exposure, for cross-sectional and cohort studies the outcome.

**Supplementary Table S4.** Quality assessment of cohort studies, using the Newcastle-Ottawa Scale (NOS), , in alphabetical order.

| Author Year [Ref]            | Selection |        |        |        | Comparability |         | Outcome/Exposure^ |        |        | Total Score/9 |
|------------------------------|-----------|--------|--------|--------|---------------|---------|-------------------|--------|--------|---------------|
|                              | Item 1    | Item 2 | Item 3 | Item 4 | Item 5a       | Item 5b | Item 6            | Item 7 | Item 8 |               |
| Abnet, et al. 008 [97]       | *         | *      | *      | *      | *             | *       | *                 | -      | *      | 8             |
| Allen, et al. 2009 [98]      | *         | *      | -      | *      | *             | *       | *                 | -      | *      | 7             |
| Carman, et al. 2009 [99]     | *         | *      | *      | *      | *             | *       | *                 | -      | *      | 8             |
| Cook, et al. 2013 [100]      | *         | *      | -      | *      | *             | *       | *                 | *      | -      | 7             |
| Cross, et al. 2011 [101]     | *         | *      | *      | *      | *             | *       | *                 | *      | -      | 8             |
| Dawsey, et al. 2014 [102]    | *         | *      | *      | *      | *             | *       | *                 | *      | -      | 8             |
| De Jonge, et al. 2007 [103]  | *         | -      | *      | -      | *             | *       | **                | *      | n.a.   | 7             |
| Engeland, et al. 2004 [104]  | *         | *      | *      | *      | *             | *       | *                 | *      | *      | 9             |
| Freedman, et al. 2007 [105]  | *         | *      | -      | *      | *             | *       | *                 | -      | *      | 7             |
| Freedman, et al. 2007 [106]  | *         | *      | *      | -      | *             | *       | *                 | -      | *      | 7             |
| Gatenby, et al. 2008 [107]   | *         | *      | *      | *      | *             | -       | *                 | *      | -      | 7             |
| Gonzalez, et al. 2006 [108]  | *         | *      | *      | -      | *             | *       | *                 | -      | *      | 7             |
| Gonzalez, et al. 2006 [109]  | *         | *      | *      | -      | *             | *       | *                 | -      | *      | 7             |
| Hardikar, et al. 2013 [110]  | *         | *      | *      | *      | *             | *       | *                 | *      | *      | 9             |
| Huerta, et al. 2010 [111]    | *         | *      | *      | -      | *             | *       | *                 | *      | *      | 8             |
| Jakszyn, et al. 2013 [112]   | *         | *      | *      | *      | *             | *       | *                 | *      | *      | 9             |
| Ji, et al. 2016 [113]        | *         | -      | *      | -      | *             | *       | *                 | *      | *      | 7             |
| Keszei, et al. 2012 [114]    | *         | *      | *      | -      | *             | *       | *                 | *      | *      | 8             |
| Keszei, et al. 2013 [115]    | *         | *      | *      | *      | *             | *       | *                 | *      | *      | 9             |
| Levi, et al. 2013 [116]      | *         | *      | -      | -      | *             | *       | *                 | *      | *      | 7             |
| Li, et al. 2013 [117]        | *         | *      | -      | *      | *             | *       | *                 | *      | -      | 7             |
| Lin, et al. 2015 [118]       | *         | *      | *      | *      | *             | *       | *                 | *      | -      | 8             |
| Merry, et al. 2007 [119]     | *         | *      | *      | *      | *             | *       | *                 | *      | *      | 9             |
| O'Doherty, et al. 2012 [120] | *         | *      | *      | *      | *             | *       | *                 | *      | -      | 8             |
| O'Doherty, et al. 2012 [121] | *         | *      | -      | -      | *             | *       | *                 | *      | *      | 7             |
| Petrick, et al. 2017 [122]   | *         | *      | -      | *      | *             | *       | *                 | *      | *      | 8             |
| Reeves, et al. 2007 [123]    | *         | *      | -      | *      | *             | *       | *                 | -      | -      | 6             |
| Ren, et al. 2010 [124]       | *         | *      | *      | *      | *             | *       | *                 | -      | *      | 8             |
| Samanic, et al. 2006 [125]   | *         | *      | *      | -      | *             | *       | *                 | *      | *      | 8             |
| Sanikini, et al. 2020 [126]  | *         | *      | *      | *      | *             | *       | *                 | *      | *      | 9             |
| Steevens, et al. 2010 [127]  | *         | *      | *      | *      | *             | *       | *                 | *      | *      | 9             |
| Steevens, et al. 2010 [128]  | *         | *      | *      | *      | *             | *       | *                 | *      | *      | 9             |
| Steevens, et al. 2011 [129]  | *         | *      | *      | *      | *             | *       | *                 | *      | *      | 9             |
| Steffen, et al. 2009 [130]   | *         | *      | *      | *      | *             | *       | *                 | -      | *      | 8             |
| Steffen, et al. 2015 [131]   | *         | *      | *      | *      | *             | *       | *                 | *      | *      | 9             |
| Vermeulen, et al. 2013 [132] | *         | *      | *      | *      | *             | *       | *                 | *      | *      | 9             |
| Xiao, et al. 2014 [134]      | *         | *      | -      | *      | *             | *       | *                 | *      | *      | 8             |



|                               |   |   |   |   |   |   |   |   |   |   |
|-------------------------------|---|---|---|---|---|---|---|---|---|---|
| Yates, et al. 2014 [133]      | * | * | * | * | * | - | * | * | * | 8 |
| Zamora-Ros, et al. 2014 [135] | * | * | * | * | * | * | * | * | * | 9 |
| Zendehdel, et al. 2008 [136]  | * | * | * | - | * | * | * | * | * | 8 |

^based on study design. For case-control the NOS assessed the exposure, for cross-sectional and cohort studies the outcome.
